# Supplementary material for: Clearance of Pneumococcal Colonization in Infants Is Delayed through Altered Macrophage Trafficking
Source: PubMed Central journal article supplement (PMC4479461; doi:10.1371/journal.ppat.1005004), 2015-06-24
Supplement: ppat.1005004.s001.pdf [file ppat.1005004.s001.pdf]

**Table S1**

| <b>Pneumococcal strain:</b> | <b>Number of bacteremic mice</b> | <b>% bacteremic mice</b> |
|-----------------------------|----------------------------------|--------------------------|
| <b>Type 23F (avirulent)</b> | 0/8                              | 0%                       |
| <b>Type 6A (virulent)</b>   | 6/9                              | 67%                      |

**Strain P1121 is avirulent in infant mice.** Seven day old mice were colonized intranasally with  $2 \times 10^3$  CFU pneumococci. Strains used were Type 23F, the avirulent strain P1121 used in experiments in the main text, and Type 6A, a strain known to cause invasive infection in adult mice. Seven days later, mice were sacrificed, and equivalent volumes of blood diluted onto TS agar with catalase and neomycin for quantitative culture overnight at 5% CO<sub>2</sub> for identification of pneumococci. Mice with any pneumococcal colonies isolated from blood were considered bacteremic.
