# Supplementary material for: Clearance of Pneumococcal Colonization in Infants Is Delayed through Altered Macrophage Trafficking
Source: PubMed Central journal article supplement (PMC4479461; doi:10.1371/journal.ppat.1005004), 2015-06-24
Supplement: ppat.1005004.s002.pdf [file ppat.1005004.s002.pdf]

Figure S1

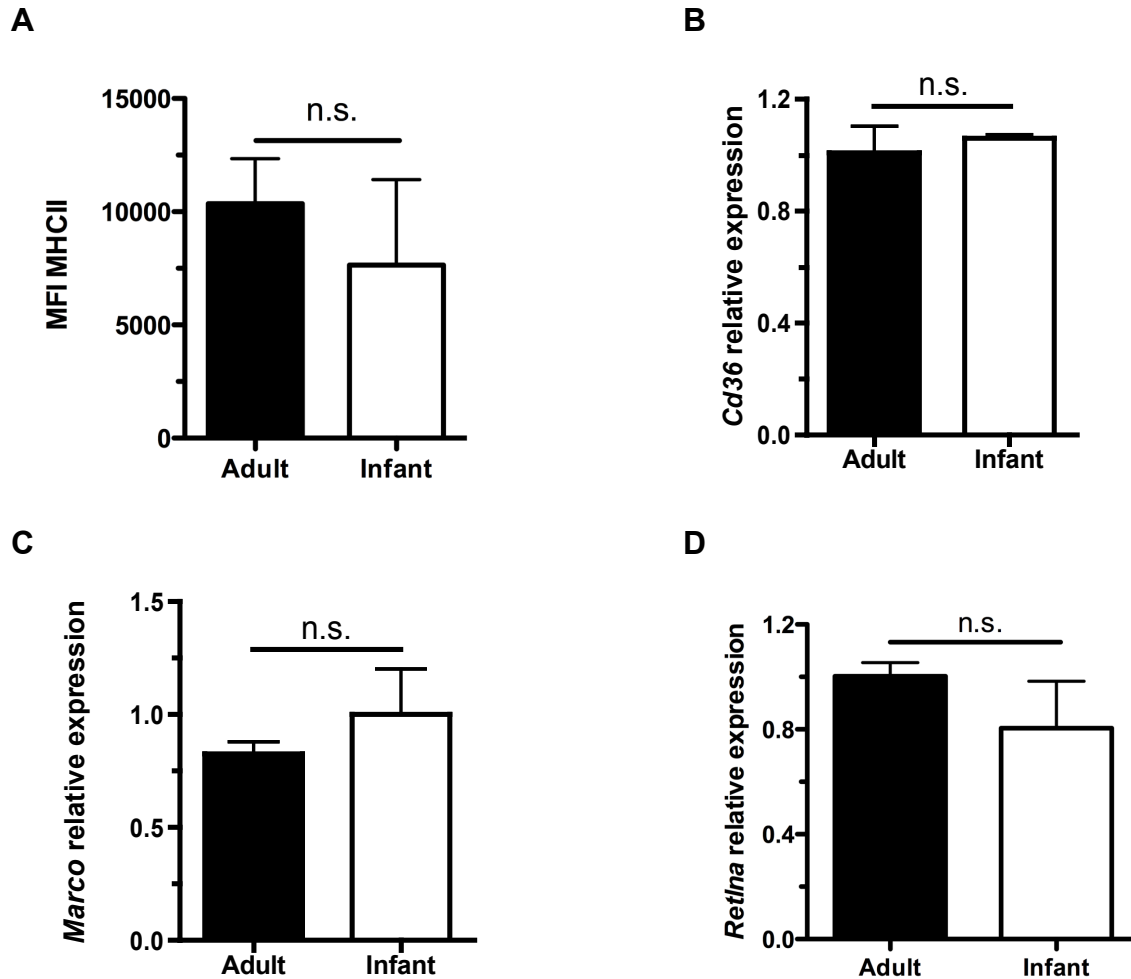

**Phenotypic characterization of adult and infant macrophages.** Peritoneal macrophages were obtained from adult and infant mice. (A) Peritoneal macrophages were stained with antibodies to identify and characterize live macrophages: anti-CD45, anti-CD11b, anti-F4/80 and anti-MHCII. Samples were run on a FACS Canto instrument (Becton Dickinson) and the median fluorescence intensity of MHCII in live macrophages graphed using FlowJo software. (B-D) Peritoneal macrophages from adult and infant mice were counted and adjusted to equal concentrations, then plated on 24-well non-tissue culture treated plates. After 2 hrs to allow macrophages to adhere, wells were washed 3 times and media added back. After an overnight incubation, cells were lysed in RLT lysis buffer, RNA obtained and qRT-PCR performed to measure relative expression of surface scavenger receptors *Cd36* (B) and *Marco* (C), as well as the alternatively-activated macrophage-associated gene *Retnla* (D). Primer sequences were as follows: *Cd36*-F 5'-GAG-CAA-CTG-GTG-GAT-GGT-TT-3'; *Cd36*-R 5'-GCA-GAA-TCA-AGG-GAG-AGC-AC-3'; *Marco*-F 5'-GGC-ACC-AAG-GGA-GAC-AAA-3'; *Marco*-R 5'-TCC-CTT-CAT-GCC-CAT-GTC-3'; *Retnla*-F 5'-CCA-ATC-CAG-CTA-ACT-ATC-CCT-CC-3'; *Retnla*-R 5'-ACC-CAG-TAG-CAG-TCA-TCC-CA-3'
